# Supplementary material
Source: publisher site journal article supplement (https://www.dovepress.com/article/361910)
Supplement: Supplementary file 1 [file get_supplementary_file.php]

# Supplementary material

## *A Supplementary material 1*

### **Definition of ischemic heart disease (IHD):**

A registration in the Danish National Patient Registry (NPR) with of one of the following codes:

ICD-8 codes: 41009, 41099, 41109, 41199, 41209, 41299, 41309, 41399, 41409, 41499.

ICD-10 codes: I20-I25 except for I20.0-I20.0B, I20.1-I20.1B, I20.8A, I20.8D-I20.8E1, I20.9 and I25.1B.

These were only included if the subject was diagnosed, within 1 month from co-diagnosis, with one of the following SKS-codes.

SKS-codes: KFNA, KFNA00, KFNA10, KFNA20, KFNA96, KFNB, KFNB00, KFNB20, KFNB96, KFNC, KFNC10, KFNC20, KFNC30, KFNC40, KFNC50, KFNC60, KFNC90, KFND, KFND10, KFND20, KFND96, KFNE, KFNE00, KFNE10, KFNE20, KFNE96, KFNF, KFNF00, KFNF10, KFNF20, KFNF30, KFNF96, KFNG, KFNG00, KFNG00A, KFNG00B, KFNG00C, KFNG00D, KFNG02, KFNG02A, KFNG05, KFNG05A, KFNG10, KFNG12, KFNG22, KFNG30, KFNG40, KFNG96

### **Definition of alcohol abuse:**

A registration in the NPR with one of the following codes:

ICD-10 codes used: F10.1-9, G31.2, K70.0-9.

ICD-8 codes used: 29109, 29119, 29120, 29129, 29139, 29199, 30309, 30319, 30320, 30328, 30329, 30391, 30399, 57109, 57110, 57710.

### **Definition of type 2 diabetes mellitus (T2DM):**

A registration in the NPR with one of the following codes:

ICD-8 codes: 24900-25009.

ICD-10 codes: E10-E14.

Or by a filled prescription of any of the antidiabetic medications (except insulin) below.

**Table A1.** Antidiabetic medication and ATC (prescription) codes.

| Medication type                  | ATC-code                                    |
|----------------------------------|---------------------------------------------|
| Beta cell stimulating agents     | A10BB01; A10BB07; A10BB09; A10BB12; A10BX02 |
| Non-beta cell stimulating agents | A10BA02                                     |
| Glitazones                       | A10BG03                                     |

|                                              |                                                                                                                          |
|----------------------------------------------|--------------------------------------------------------------------------------------------------------------------------|
| DPP-IV inhibitors and combinations           | A10BD07; A10BD08; A10BD10; A10BD11; A10BD13<br>A10BD19; A10BD21; A10BD24; A10BH01; A10BH02;<br>A10BH03; A10BH04; A10BH05 |
| Selective SGLT-2-inhibitors and combinations | A10BK01; A10BK02; A10BK03; A10BK04; A10BD15;<br>A10BD20; A10BD23                                                         |
| GLP-1-receptoragonists and combinations      | A10BJ01; A10BJ02; A10BJ03; A10BJ05; A10BJ06;<br>A10AE54; A10AE56                                                         |

Note: Subjects with a filled prescription of the GLP-1 analogue Saxenda, used in the treatment of obesity and not diabetes, was not counted.

### **Definition of hepatitis C virus infection:**

A registration in the NPR with one of the following codes:

ICD-8 codes: 07004, 07005.

ICD-10 codes: B18.2.

### **Definition of cerebral ischemia:**

A registration in the NPR with one of the following codes:

ICD-8 codes: 43200-43202, 43208, 43209, 43290-43293, 43298, 43299, 43309, 43399, 43409, 43499, 43509, 54599, 43600, 43601, 43609, 43699, 43700, 43701, 43708, 43709, 43790, 43798, 43799, 43809.

ICD-10 codes: I63, I63.0-I63.3, I63.5, I636, I638, I639, I65, I65.0, I65.0A, I65.0B, I65.1, I65.1A, I65.1B, I65.2, I65.2A, I65.2B, I65.3, I65.3A-165.3D, I65.8, I65.9, I66, I66.0, I66.0A, I66.0B, I66.1, I66.1A, I66.1B, I66.2, I66.2A, I66.2B, I66.3, I66.3A, I66.3B, I66.4, I66.4A-I66.4D, I66.8, I66.8A, I66.9

### **Definition of HIV:**

A registration in the NPR with one of the following codes:

ICD-8 codes: 07983

ICD-10 codes: B20.0-B24.9

### **Definition of cirrhosis:**

A registration in the NPR with one of the following codes:

ICD-8 codes: 57192, 57199, 45600, 45601, 45609, 57300, 78539

ICD-10 codes: I850, I859, I864, I864A, K658I, K703, K703A, K704A, K704B, K704C, K704D, K721, K729, K746, K766, K767, R189.

## ***B Supplementary material 2***

### **Coding algorithm for Charlson Comorbidity Index (CCI) score:**

**Table B1.** Coding algorithm used for scoring subjects on the Charlson Comorbidity Index (CCI).

| Disease                   | ICD-8 and ICD-10 codes                                                                                                                                                                 | Score |
|---------------------------|----------------------------------------------------------------------------------------------------------------------------------------------------------------------------------------|-------|
| Congestive heart failure  | 42709, 42710, 42711, 42719, 42899, 78249<br>I09.9, I11.0, I13.0 I13.2, I25.5, I42.0, I42.5-I42.9, I50.x, P29.0                                                                         | 2     |
| Dementia                  | 29009, 29010, 29011, 29018, 29019<br>F.00x-F03.x, F05.1, G30.x, G31.1                                                                                                                  | 2     |
| Chronic Pulmonary disease | 49000-49309, 51509-51899<br>I27.8, I27.9 J40.x-J47.x, J60.x-J67.x, J68.4, J70.1, J70.3                                                                                                 | 1     |
| Rheumatologic disease     | 44631-44639, 71209-71259, 71495-71619, 73400-73499<br>M05.x, M06.x, M31.5, M32.x-M34.x, M35.1, M35.3, M36.0                                                                            | 1     |
| Hemi/paraplegia           | 34300-34303, 34399, 34499<br>G04.1, G11.4, G80.1, G80.2, G81.x, G82.x, G83.0-G83.4, G83.9                                                                                              | 2     |
| Renal disease             | 40399, 40499, 58199-, 58201-58209, 58301-58499, 59320-59322, 75310, 75311, 75319                                                                                                       | 1     |
| Membranoproliferative GN  | I12.0, I13.1, N03.4-N03.7, N05.4-N05.7, N18.x, N19.x, N25.0, Z49.0-Z49.2, Z94.0, Z99.2                                                                                                 |       |
| Membranous GN             |                                                                                                                                                                                        |       |
| Mesangial GN              |                                                                                                                                                                                        |       |
| Any malignancy            | 14009-15429, 15519-17199, 17401-19599, 20199, 20399-20799<br>C00-C21.x, C22.1-C22.7, C23.x-C26.x, C30.x-C34.x, C37.x-C41.x, C43.x, C45.x-C58.x, C60.x-C76.x, C81.x, C88.x, C90.x-C97.x | 2     |
| Metastatic solid tumour   | 19609-19919<br>C77.x-C80.x                                                                                                                                                             | 6     |
